# Supplementary material for: NK cells produce high levels of IL‐10 early after allogeneic stem cell transplantation and suppress development of acute GVHD
Source: PubMed Central journal article supplement (PMC5836991; doi:10.1002/eji.201747134), 2017-10-27
Supplement: EJI-48-316-s002.pdf [file EJI-48-316-s002.pdf]

# European Journal of Immunology

**Supporting Information**

**for**

**DOI 10.1002/eji.201747134**

Yuen Ling Tracey Chan, Jianmin Zuo, Charlotte Inman, Wayne Croft,  
Jusnara Begum, Joanne Croudace, Francesca Kinsella, Luke Maggs,  
Sandeep Nagra, Jane Nunnick, Ben Abbotts, Charles Craddock, Ram Malladi  
and Paul Moss

**NK cells produce high levels of IL-10 early after allogeneic stem cell  
transplantation and suppress development of acute GVHD**

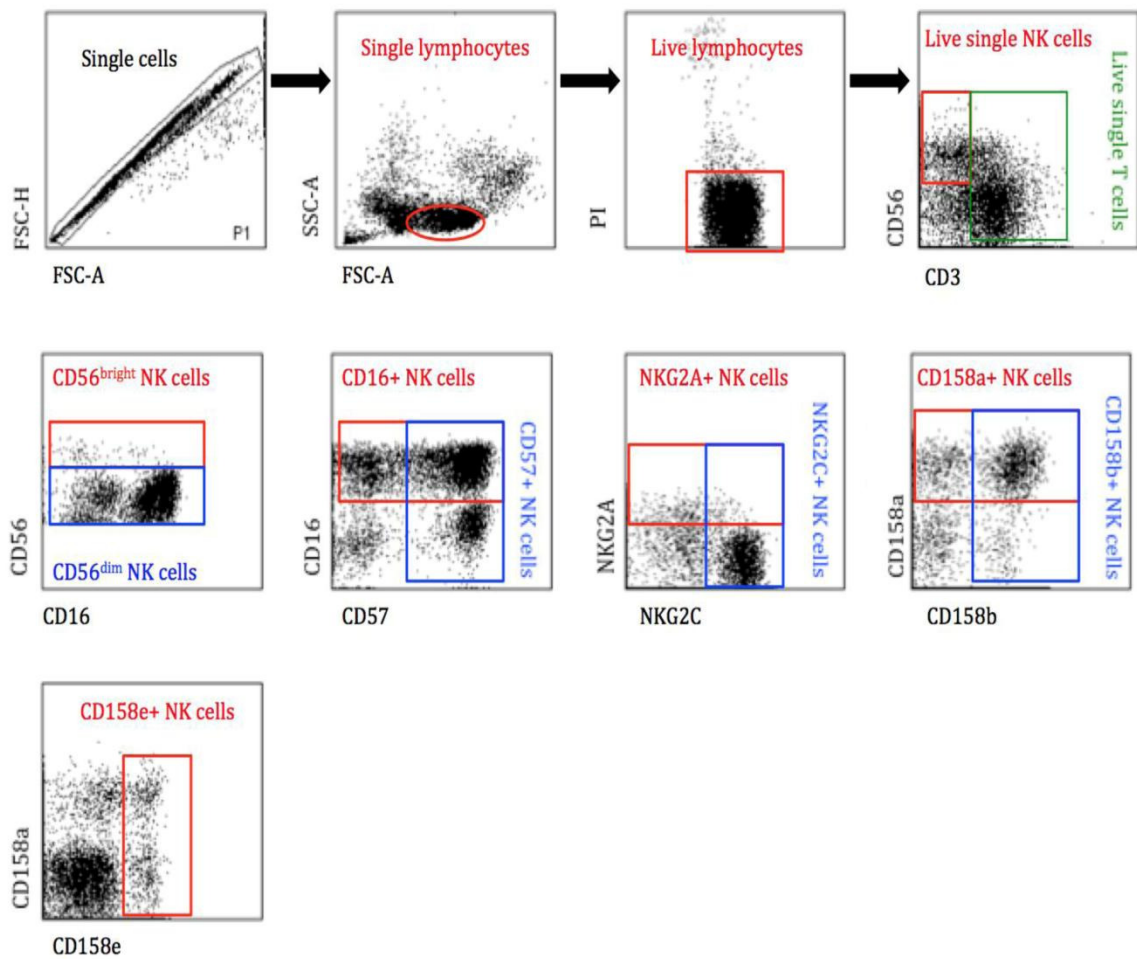

**Supplementary Figure 1. Gating strategy to determine immunophenotype of NK cells and their subsets**

The top four panels are gated down sequentially using the preceding panel's gate as the total population. The live single NK cell gate is used to populate the bottom five plots.

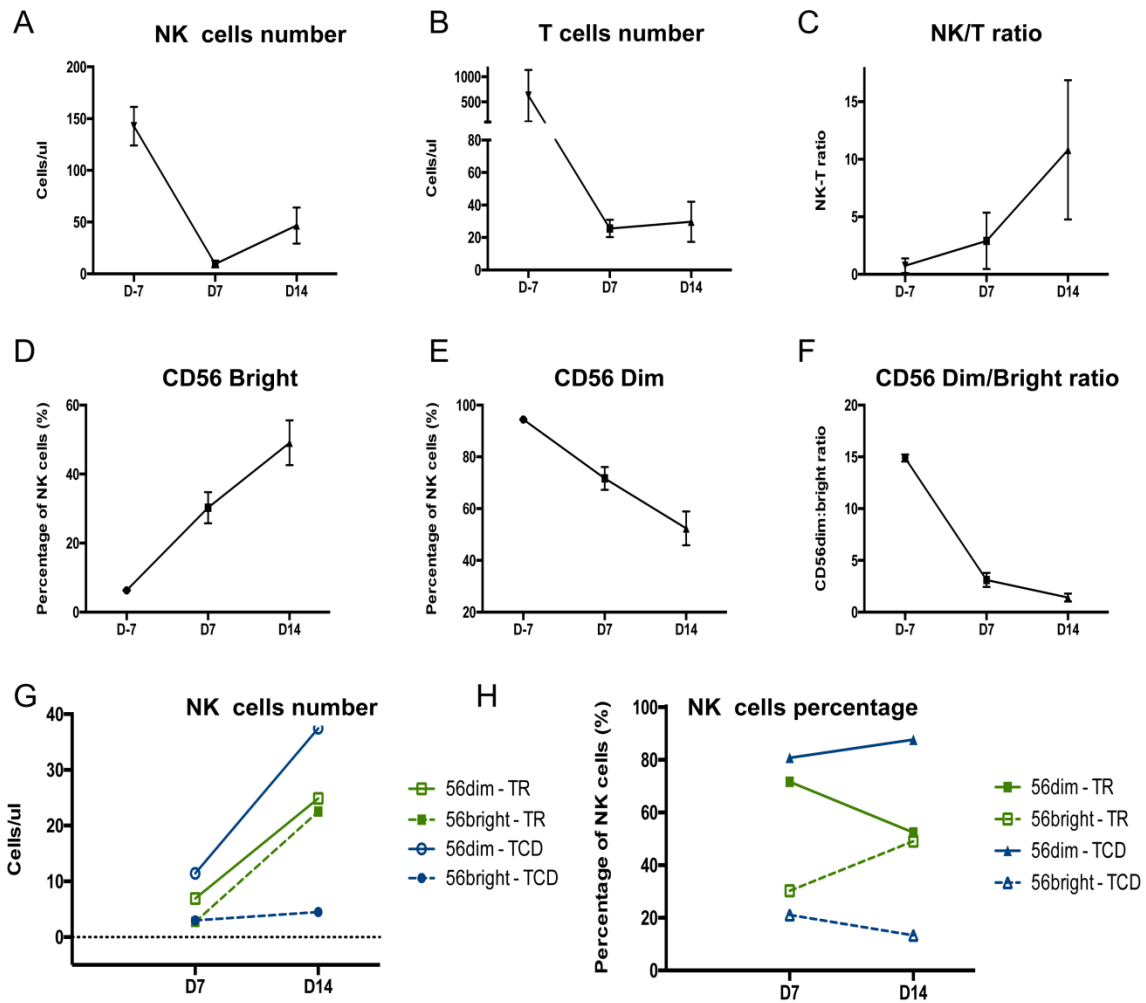

**Supplementary Figure 2. NK and T cell reconstitution following T cell replete (TR) allo-SCT**

(A) The reconstitution of the number of NK cells in the first 14 days following TR allo-SCT (B) The reconstitution of the number of T cells in the first 14 days following TR allo-SCT. (C) The ratio of NK cell: T cell number up to 14 days following TR allo-SCT. (D) CD56<sup>bright</sup> NK cells and (E) CD56<sup>dim</sup> NK cells expressed as a percentage of the total NK cell population in the first 14 days following TR allo-SCT. (F) The ratio of CD56<sup>dim</sup> NK cells: CD56<sup>bright</sup> NK cells plotted following TR allo-SCT. All graphs depict mean and error bars represent the standard error of the mean. Graphs display the mean with error bars representing the standard error. D -7 (n=2), D 7 (n=9), D 14 (n=8). (G) The comparison of the reconstitution of the number of CD56<sup>dim</sup> NK cells and CD56<sup>bright</sup> NK cells between T cell deplete and T cell replete allo-SCT. (H) The comparison of the percentage of CD56<sup>dim</sup> NK cells and CD56<sup>bright</sup> NK cells between T cell deplete and T cell replete allo-SCT..

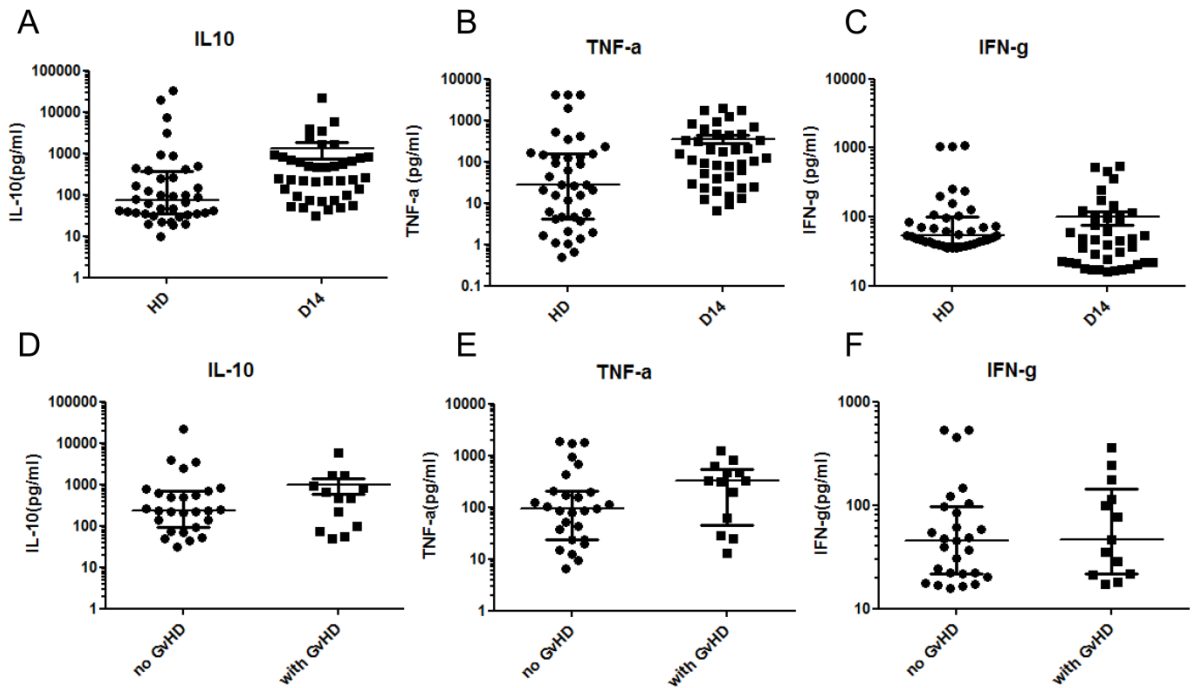

**Supplementary Figure 3. The concentration of IL-10, TNF- $\alpha$  and IFN- $\gamma$  in the serum from day 14 patients after allo-SCT.**

The concentration of IL-10 (A), TNF- $\alpha$  (B) and IFN- $\gamma$  (C) are studied using ELISA (R&D system, DY217B, DY410 and DY485) with the serum from healthy donors (n=40) and day 14 patients after allo-SCT (n=40). The comparison of IL-10 (D), TNF- $\alpha$  (E) and IFN- $\gamma$  (F) between the day 14 patients who developed GvHD (n=13) and who did not develop GvHD (n=27).

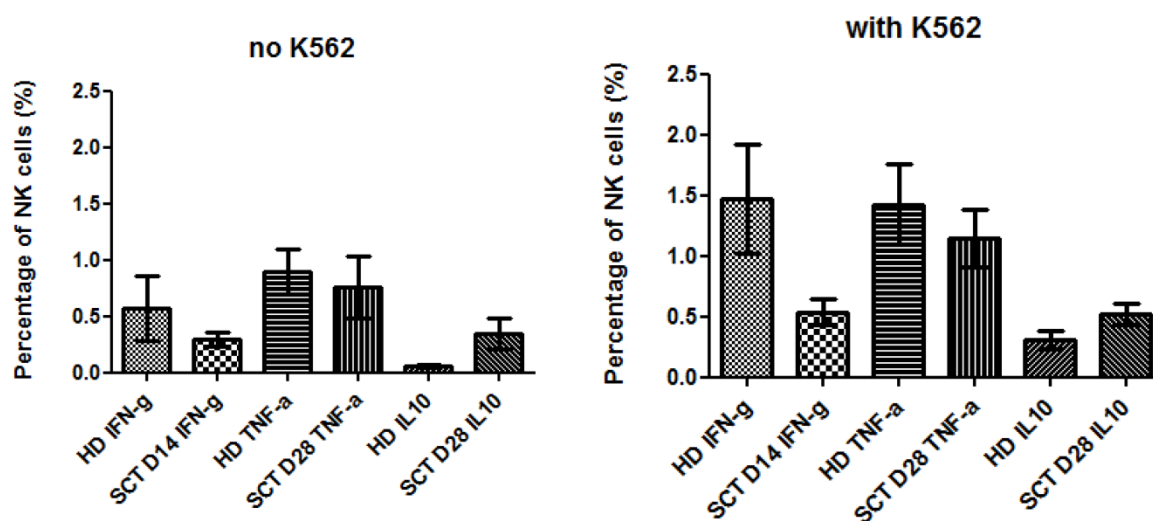

**Supplementary Figure 4. The cytokines profile of NK cells of patients at day28 after allo-SCT.** The whole PBMC were either stimulated with K562 as 1:1 ratio or with media only for 18hrs. Then the intracellular expression of IL-10, TNF- $\alpha$  and IFN- $\gamma$  in NK cells (gated as CD3 negative and CD56 positive population) were stained from patients (n=5) at day28 after all-SCT. The data were shown as the percentage of NK cells producing cytokines without K562 stimulation (A) or with K562 stimulation (B). The NK cells from healthy donors (n=5) were used as control.

A

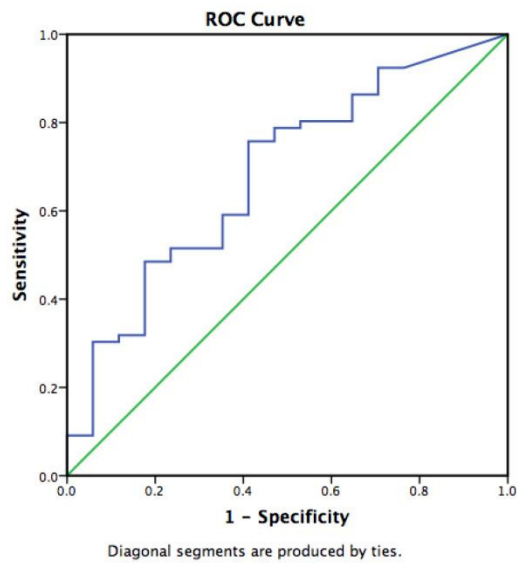

**D7**

AUC: 0.683

Standard error: 0.072

Asymptotic significance: 0.021

Asymptotic 95% CI: 0.541-0.824

B

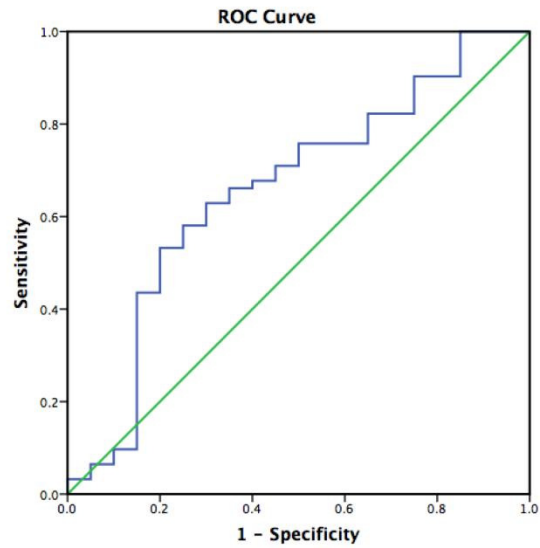

**D14**

AUC: 0.657

Standard error: 0.072

Asymptotic significance: 0.035

Asymptotic 95% CI: 0.513-801

**Supplementary Figure 5.** Receiver operating characteristic curve analysis demonstrates the ability of the absolute NK cell count at D7 (A) and D14 (B) to predict aGVHD.

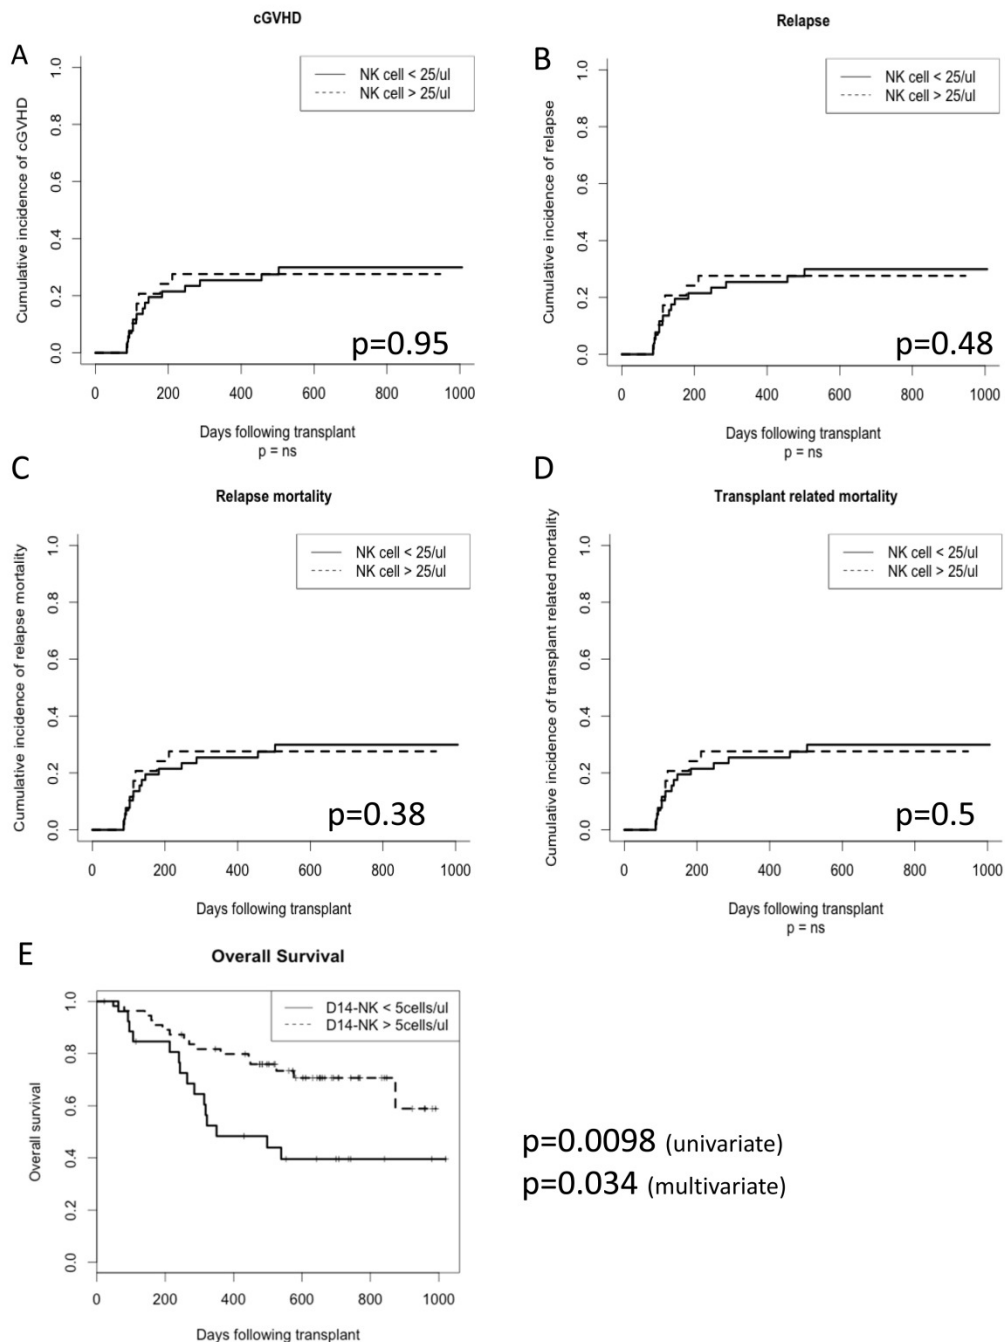

**Supplementary Figure 6. D14-NK <25 cells/ $\mu$ l is not a significant predictor of the cumulative incidence of chronic GVHD, disease relapse, relapse mortality or transplant related mortality. An absolute NK-14 cell count <5cells/ $\mu$ l is associated with an increase in mortality.** Cumulative incidence curve (Fine and Gray test) to compare the incidence of chronic GVHD (A), relapse (B), relapse mortality (C) and transplant related mortality (D) between different NK-14 cell number groups (cut-off point as 25 cell/ $\mu$ l). All p- values are for univariate analysis. (E) Kaplan-Meier curve (log-rank test) to compare the overall survival between different NK-14 cell number group (cut-off point 5 cell/ $\mu$ l).

| Genes upregulated on NK-14 vs HD   |                     |            |                                                                                 |
|------------------------------------|---------------------|------------|---------------------------------------------------------------------------------|
| Gene Name                          | log <sub>2</sub> FC | Adjusted p | Gene Description                                                                |
| KIR3DX1                            | 2.46                | 0.05       | killer cell immunoglobulin-like receptor, three domains, X1                     |
| DENN3                              | 1.28                | 0.08       | DENN/MADD domain containing 3                                                   |
| MIR4633                            | 0.97                | 0.07       | microRNA 4633                                                                   |
| CTC-467M3.3                        | 0.85                | 0.07       | novel transcript                                                                |
| TPX2                               | 0.83                | 0.08       | TPX2, microtubule-associated                                                    |
| SNAR-I                             | 0.77                | 0.06       | small ILF3/NF90-associated RNA I                                                |
| NUSAP1                             | 0.74                | 0.07       | nucleolar and spindle associated protein 1                                      |
| RP11-388N2.1                       | 0.72                | 0.06       | putative novel transcript                                                       |
| NFKB2                              | 0.58                | 0.09       | nuclear factor of kappa light polypeptide gene enhancer in B-cells 2 (p49/p100) |
| FAM218A                            | 0.55                | 0.09       | family with sequence similarity 218, member A                                   |
| Genes downregulated on NK-14 vs HD |                     |            |                                                                                 |
| RNA5SP82                           | -3.86               | 0.06       | RNA, 5S ribosomal pseudogene 82                                                 |
| SNORD116-3                         | -2.98               | 0.09       | small nucleolar RNA, C/D box 116-3                                              |
| RP11-370K11.1                      | -2.84               | 0.06       | novel transcript                                                                |
| RNU6-872P                          | -2.82               | 0.06       | RNA, U6 small nuclear 872, pseudogene                                           |
| RNU6-1297P                         | -2.59               | 0.06       | RNA, U6 small nuclear 1297, pseudogene                                          |
| RNU4-54P                           | -2.52               | 0.06       | RNA, U4 small nuclear 54, pseudogene                                            |
| BRE-AS1                            | -2.32               | 0.07       | BRE antisense RNA 1                                                             |
| DOK6                               | -2.25               | 0.10       | docking protein 6                                                               |
| NME8                               | -2.21               | 0.06       | NME/NM23 family member 8                                                        |
| AOAH-IT1                           | -2.21               | 0.09       | AOAH intronic transcript 1 (non-protein coding)                                 |
| STK38                              | -2.15               | 0.06       | serine/threonine kinase 38                                                      |
| AKT3                               | -2.11               | 0.05       | v-akt murine thymoma viral oncogene homolog 3                                   |
| CARD8                              | -1.96               | 0.05       | caspase recruitment domain family, member 8                                     |
| PTPRJ                              | -1.94               | 0.08       | protein tyrosine phosphatase, receptor type, J                                  |
| RNU6-878P                          | -1.93               | 0.10       | RNA, U6 small nuclear 878, pseudogene                                           |
| AOAH                               | -1.93               | 0.06       | acyloxyacyl hydrolase (neutrophil)                                              |
| HIST1H2BI                          | -1.88               | 0.06       | histone cluster 1, H2bi                                                         |
| RP11-269F20.1                      | -1.79               | 0.10       | putative novel transcript                                                       |
| TRGV8                              | -1.77               | 0.06       | T cell receptor gamma variable 8                                                |
| FCRL6                              | -1.76               | 0.09       | Fc receptor-like 6                                                              |
| VNN2                               | -1.74               | 0.06       | vanin 2                                                                         |
| WHSC1L1                            | -1.73               | 0.09       | Wolf-Hirschhorn syndrome candidate 1-like 1                                     |
| NLK                                | -1.66               | 0.10       | nemo-like kinase                                                                |
| ZNF827                             | -1.54               | 0.08       | zinc finger protein 827                                                         |
| ARHGAP15 // LOC101928361           | -1.52               | 0.10       | Rho GTPase activating protein 15 // uncharacterized LOC101928361                |
| AF131217.1                         | -1.43               | 0.06       | novel transcript                                                                |
| TSPAN3                             | -1.40               | 0.07       | tetraspanin 3                                                                   |
| IKZF2                              | -1.37               | 0.07       | IKAROS family zinc finger 2 (Helios)                                            |
| RNU6-628P                          | -1.36               | 0.06       | RNA, U6 small nuclear 628, pseudogene                                           |
| LOC202025                          | -1.35               | 0.07       | uncharacterized LOC202025                                                       |
| FRYL                               | -1.30               | 0.07       | FRY-like                                                                        |
| RNA5SP390                          | -1.29               | 0.08       | RNA, 5S ribosomal pseudogene 390                                                |
| BBS9                               | -1.24               | 0.06       | Bardet-Biedl syndrome 9                                                         |
| IGF1R                              | -1.18               | 0.06       | insulin-like growth factor 1 receptor                                           |
| ZNF43                              | -1.18               | 0.10       | zinc finger protein 43                                                          |
| KIF2A                              | -1.17               | 0.10       | kinesin heavy chain member 2A                                                   |
| LINC00264                          | -1.15               | 0.06       | long intergenic non-protein coding RNA 264                                      |
| ABC A5                             | -1.12               | 0.06       | ATP-binding cassette, sub-family A (ABC1), member 5                             |
| CDK8                               | -1.10               | 0.10       | cyclin-dependent kinase 8                                                       |
| DGKK                               | -1.09               | 0.09       | diacylglycerol kinase, kappa                                                    |
| MRPS14                             | -1.08               | 0.10       | mitochondrial ribosomal protein S14                                             |
| ZMYM1                              | -1.05               | 0.10       | zinc finger, MYM-type 1                                                         |
| MGAT5                              | -1.05               | 0.06       | mannosyl (alpha-1,6)-glycoprotein beta-1,6-N-acetyl-glucosaminyltransferase     |
| RP11-101E14.2                      | -1.04               | 0.07       | putative novel transcript                                                       |
| ZBTB20                             | -1.03               | 0.08       | zinc finger and BTB domain containing 20                                        |
| KLHDC10                            | -1.00               | 0.08       | kelch domain containing 10                                                      |
| SNORD107                           | -0.95               | 0.06       | small nucleolar RNA, C/D box 107                                                |
| FLJ44635                           | -0.93               | 0.10       | TPT1-like protein                                                               |
| CNOT6                              | -0.92               | 0.07       | CCR4-NOT transcription complex, subunit 6                                       |
| MBD5                               | -0.92               | 0.09       | methyl-CpG binding domain protein 5                                             |
| SNORD19                            | -0.90               | 0.06       | small nucleolar RNA, C/D box 19                                                 |
| MYO9A                              | -0.89               | 0.10       | myosin IXA                                                                      |
| AC079584.2                         | -0.88               | 0.06       | novel transcript                                                                |
| STIM1                              | -0.88               | 0.10       | stromal interaction molecule 1                                                  |
| RP4-798A10.4                       | -0.87               | 0.09       | novel transcript                                                                |
| KCNJ1                              | -0.87               | 0.06       | potassium inwardly-rectifying channel, subfamily J, member 1                    |
| TBCK                               | -0.85               | 0.07       | TBC1 domain containing kinase                                                   |
| SEPT1                              | -0.83               | 0.06       | septin 1                                                                        |
| UBE2Q2P1                           | -0.82               | 0.08       | ubiquitin-conjugating enzyme E2Q family member 2 pseudogene 1                   |
| IMMP1L                             | -0.79               | 0.10       | IMMP1 inner mitochondrial membrane peptidase-like (S. cerevisiae)               |
| ACADSB                             | -0.78               | 0.10       | acyl-CoA dehydrogenase, short/branched chain                                    |
| MBNL3                              | -0.75               | 0.07       | muscleblind-like splicing regulator 3                                           |
| ACO1                               | -0.74               | 0.10       | aconitase 1, soluble                                                            |
| FAM172A                            | -0.72               | 0.10       | family with sequence similarity 172, member A                                   |
| ZMYND8                             | -0.70               | 0.10       | zinc finger, MYND-type containing 8                                             |
| LOC389765                          | -0.66               | 0.07       | kinesin family member 27 pseudogene                                             |
| UST                                | -0.65               | 0.10       | uronyl-2-sulfotransferase                                                       |
| BBIP1                              | -0.65               | 0.06       | BBSome interacting protein 1                                                    |
| RP11-381K20.2                      | -0.64               | 0.10       | novel transcript                                                                |
| FUT8                               | -0.63               | 0.06       | fucosyltransferase 8 (alpha (1,6) fucosyltransferase)                           |
| LOC101927150                       | -0.61               | 0.09       | uncharacterized LOC101927150                                                    |
| NEO1                               | -0.58               | 0.07       | neogenin 1                                                                      |
| ZMAT1                              | -0.53               | 0.07       | zinc finger, matrin-type 1                                                      |
| FOCAD                              | -0.49               | 0.10       | focadhesin                                                                      |

**Supplementary Table 1** The genes with differential expression between HD-NK and D14-NK from the microarray analysis with an adjusted p-value of  $\leq 0.1$ .



| Gene Set                                                                        | Mean log <sub>2</sub> FC | Gene set size | -Log(FDR)   |               |
|---------------------------------------------------------------------------------|--------------------------|---------------|-------------|---------------|
|                                                                                 |                          |               | UP in NK-14 | Down in NK-14 |
| KEGG_NATURAL_KILLER_CELL_MEDIATED_CYTOTOXICITY                                  | -4.50                    | 133           | 0.00        | 3.73          |
| REACTOME_REGULATION_OF_IFNG_SIGNALING                                           | -1.15                    | 13            | 0.00        | 0.48          |
| PID_IFNG_PATHWAY                                                                | -3.24                    | 40            | 0.00        | 1.97          |
| GO_NEGATIVE_REGULATION_OF_INTERFERON_GAMMA_PRODUCTION                           | 1.12                     | 35            | 0.15        | 0.00          |
| GO_REGULATION_OF_INTERFERON_GAMMA_PRODUCTION                                    | -0.95                    | 93            | 0.00        | 0.26          |
| GO_INTERFERON_GAMMA_PRODUCTION                                                  | -0.97                    | 15            | 0.00        | 0.26          |
| GO_POSITIVE_REGULATION_OF_INTERFERON_GAMMA_PRODUCTION                           | -1.52                    | 61            | 0.00        | 0.47          |
| GO_NEGATIVE_REGULATION_OF_TUMOR_NECROSIS_FACTOR_SUPERFAMILY_CYTOKINE_PRODUCTION | 1.37                     | 43            | 0.21        | 0.00          |
| GO_POSITIVE_REGULATION_OF_TUMOR_NECROSIS_FACTOR_SUPERFAMILY_CYTOKINE_PRODUCTION | -1.18                    | 56            | 0.00        | 0.34          |
| GO_NATURAL_KILLER_CELL_ACTIVATION                                               | -1.71                    | 53            | 0.00        | 0.56          |
| GO_POSITIVE_REGULATION_OF_NATURAL_KILLER_CELL_ACTIVATION                        | -1.20                    | 18            | 0.00        | 0.35          |
| NK_RELATED_TRANSCRIPTION_FACTORS                                                | -1.51                    | 10            | 0.03        | 1.12          |

**Supplementary Table 2: Gene set enrichment analysis of NK cell physiology pathways.** The gene set enrichment analysis was carried out using various gene sets, including cytotoxicity pathway, IFNG production pathway, TNF production pathway and NK related transcription factors. All of these gene sets are obtained from MSigDB (<http://software.broadinstitute.org/gsea/msigdb/index.jsp>) other than NK\_RELATED\_TRANSCRIPTION\_FACTORS, (including: E4BP4, ID2, BLIMP1, EOMES, ETS-1, GATA-3, HELIOS, KLF4, T-bet and TOX) which is gathered from a review ( *Frontiers in Immunology*. 2012;3:319. doi:10.3389/fimmu.2012.00319.). The FDR is the false discovery rate (the adjusted p value) and anything with FDR <=0.1 (or -Log(FDR)>=1) is considered a significant enrichment of the genes in the gene set.

| <b>D7</b>         | <b>Area</b>  | <b>Standard error</b> | <b>Asymptotic significance</b> | <b>Asymptotic 95% CI</b> |
|-------------------|--------------|-----------------------|--------------------------------|--------------------------|
| <b>total NK</b>   | <b>0.683</b> | <b>0.072</b>          | <b>0.021</b>                   | <b>0.541-0.824</b>       |
| <b>CD56bright</b> | <b>0.673</b> | <b>0.072</b>          | <b>0.029</b>                   | <b>0.531-0.815</b>       |
| <b>CD56dim</b>    | <b>0.678</b> | <b>0.073</b>          | <b>0.024</b>                   | <b>0.535-0.822</b>       |
| <b>NKG2A</b>      | <b>0.696</b> | <b>0.073</b>          | <b>0.013</b>                   | <b>0.553-0.839</b>       |
| <b>NKG2C</b>      | <b>0.659</b> | <b>0.069</b>          | <b>0.045</b>                   | <b>0.523-0.794</b>       |
| <b>CD57</b>       | <b>0.708</b> | <b>0.068</b>          | <b>0.009</b>                   | <b>0.574-0.841</b>       |
| <b>KIR</b>        | <b>0.694</b> | <b>0.072</b>          | <b>0.014</b>                   | <b>0.553-0.836</b>       |
| <b>CD16</b>       | <b>0.678</b> | <b>0.080</b>          | <b>0.042</b>                   | <b>0.522-0.834</b>       |

| <b>D14</b>      | <b>Area</b>  | <b>Standard error</b> | <b>Asymptotic significance</b> | <b>Asymptotic 95% CI</b> |
|-----------------|--------------|-----------------------|--------------------------------|--------------------------|
| <b>total NK</b> | <b>0.657</b> | <b>0.073</b>          | <b>0.035</b>                   | <b>0.513-0.801</b>       |
| CD56bright      | 0.635        | 0.069                 | 0.07                           | 0.5-0.771                |
| <b>CD56dim</b>  | <b>0.664</b> | <b>0.074</b>          | <b>0.028</b>                   | <b>0.518-0.809</b>       |
| <b>NKG2A</b>    | <b>0.667</b> | <b>0.069</b>          | <b>0.025</b>                   | <b>0.532-0.801</b>       |
| <b>NKG2C</b>    | <b>0.655</b> | <b>0.072</b>          | <b>0.038</b>                   | <b>0.514-0.796</b>       |
| CD57            | 0.610        | 0.075                 | 0.139                          | 0.464-0.757              |
| KIR             | 0.638        | 0.078                 | 0.069                          | 0.486-0.790              |
| CD16            | 0.647        | 0.088                 | 0.085                          | 0.474-0.820              |

| <b>D28</b> | <b>Area</b> | <b>Standard error</b> | <b>Asymptotic significance</b> | <b>Asymptotic 95% CI</b> |
|------------|-------------|-----------------------|--------------------------------|--------------------------|
| total NK   | 0.507       | 0.163                 | 0.965                          | 0.188-0.825              |
| CD56bright | 0.573       | 0.163                 | 0.631                          | 0.253-0.894              |
| CD56dim    | 0.480       | 0.146                 | 0.896                          | 0.194-0.766              |
| NKG2A      | 0.547       | 0.161                 | 0.760                          | 0.232-0.862              |
| NKG2C      | 0.440       | 0.157                 | 0.694                          | 0.132-0.748              |
| CD57       | 0.480       | 0.151                 | 0.896                          | 0.184-0.776              |
| KIR        | 0.480       | 0.165                 | 0.896                          | 0.158-0.802              |
| CD16       | 0.593       | 0.197                 | 0.644                          | 0.207-0.978              |

| <b>D100</b> | <b>Area</b> | <b>Standard error</b> | <b>Asymptotic significance</b> | <b>Asymptotic 95% CI</b> |
|-------------|-------------|-----------------------|--------------------------------|--------------------------|
| total NK    | 0.434       | 0.153                 | 0.685                          | 0.135-0.734              |
| CD56bright  | 0.316       | 0.142                 | 0.256                          | 0.037-0.595              |
| CD56dim     | 0.408       | 0.159                 | 0.570                          | 0.096-0.720              |
| NKG2A       | 0.316       | 0.127                 | 0.256                          | 0.067-0.565              |
| NKG2C       | 0.474       | 0.181                 | 0.871                          | 0.119-0.828              |
| CD57        | 0.434       | 0.162                 | 0.685                          | 0.116-0.752              |
| KIR         | 0.421       | 0.160                 | 0.626                          | 0.108-0.734              |
| CD16        | 0.434       | 0.166                 | 0.685                          | 0.108-0.760              |

**Supplementary Table 3: An assessment of the ability of absolute NK cell number and NK subset number at varying time points to predict acute GVHD. Receiver operating characteristic curve analysis.**
